# Supplementary material
Source: MDPI journal article supplement (https://www.mdpi.com/2073-4352/10/2/131)
Supplement: s1 [file s1]

## Supplementary information

# Depth profiling of ion-implanted 4H-SiC using confocal Raman spectroscopy

Ying Song <sup>1</sup>, Zongwei Xu <sup>1,\*</sup>, Tao Liu <sup>1</sup>, Mathias Rommel <sup>2,\*</sup>, Hong Wang <sup>3</sup>, Yufang Wang <sup>4</sup>, Fengzhou Fang <sup>1,\*</sup>

<sup>1</sup> State Key Laboratory of Precision Measuring Technology & Instruments, Centre of Micro/Nano Manufacturing Technology, Tianjin University, Tianjin 300072, P. R. China; songying@tju.edu.cn (Y.S); dlutlt@tju.edu.cn (T.L)

<sup>2</sup> Fraunhofer Institute for Integrated Systems and Device Technology, Schottkystrasse 10, 91058 Erlangen, Germany;

<sup>3</sup> State Key Laboratory of Separation Membranes and Membrane Processes, School of Materials Science and Engineering, Tianjin Polytechnic University, Tianjin 300387, P. R. China; waho7808@163.com

<sup>4</sup> Department of Physics, Nankai University, Tianjin 300071, China; yfwang@nankai.edu.cn

\* Correspondence: zongweixu@tju.edu.cn; mathias.rommel@iisb.fraunhofer.de; fzfang@tju.edu.cn

The fitting results of 50L× lens at +5 μm and 100× lens at +1 μm are shown below. The black lines are the original spectra, the green and blue lines are the LO and LOPC peaks after fitting process with Gauss-Lorentz function.

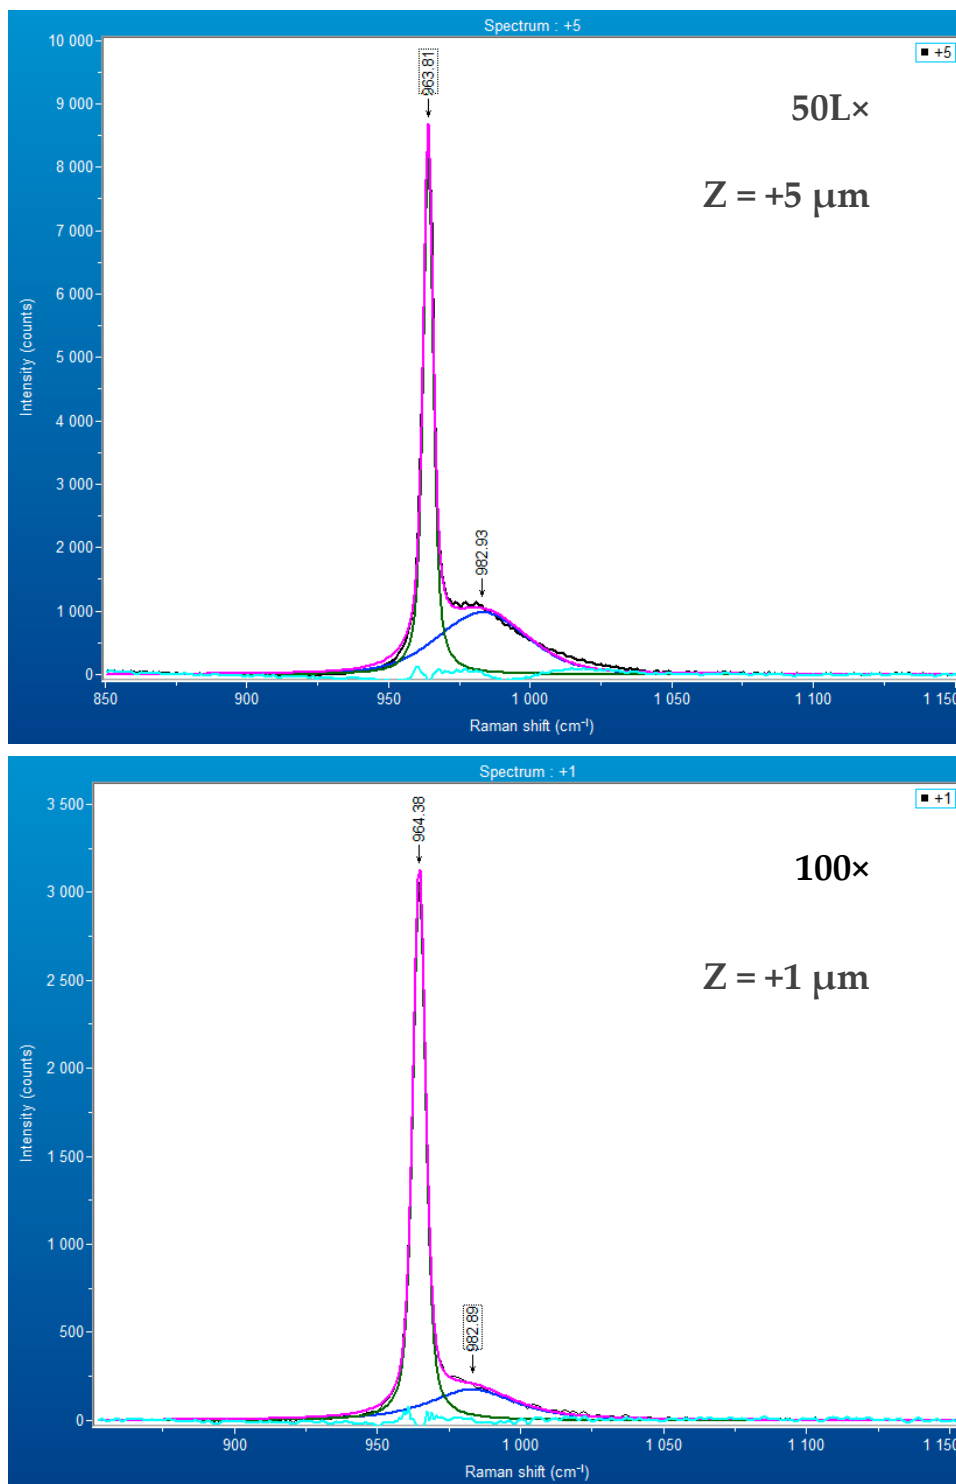

**Figure S1.** The fitting results of 50L $\times$  lens at +5  $\mu\text{m}$  and 100 $\times$  lens at +1  $\mu\text{m}$  are shown below. The black lines are the original spectra, the green and blue lines are the LO and LOPC peaks after fitting process with Gauss-Lorentz function.

The spectra and the fitting error (with respect to the peak positions) of sample A<sub>p</sub>, Q1 and B2 are shown below.

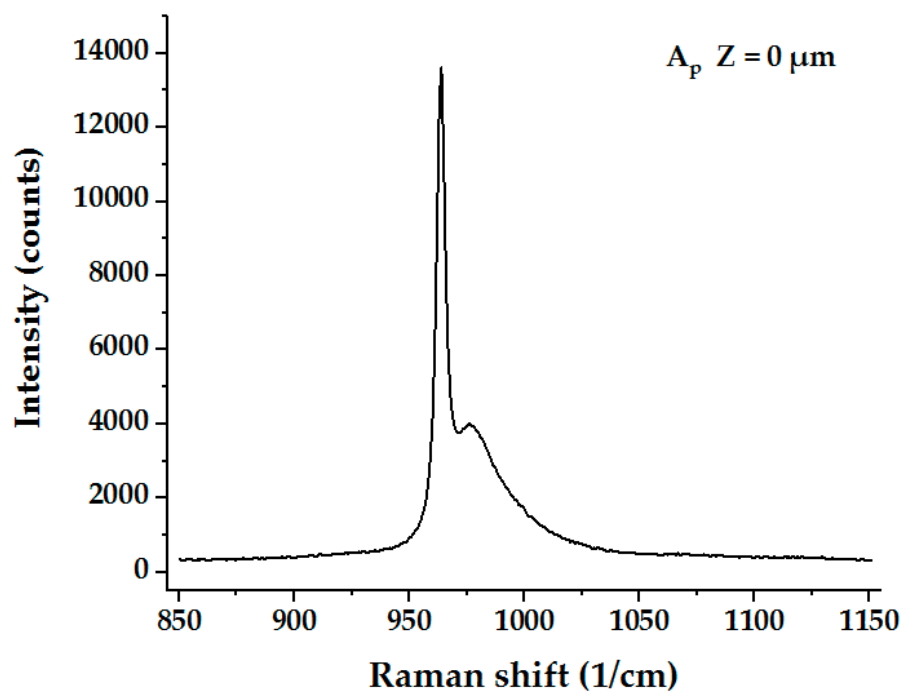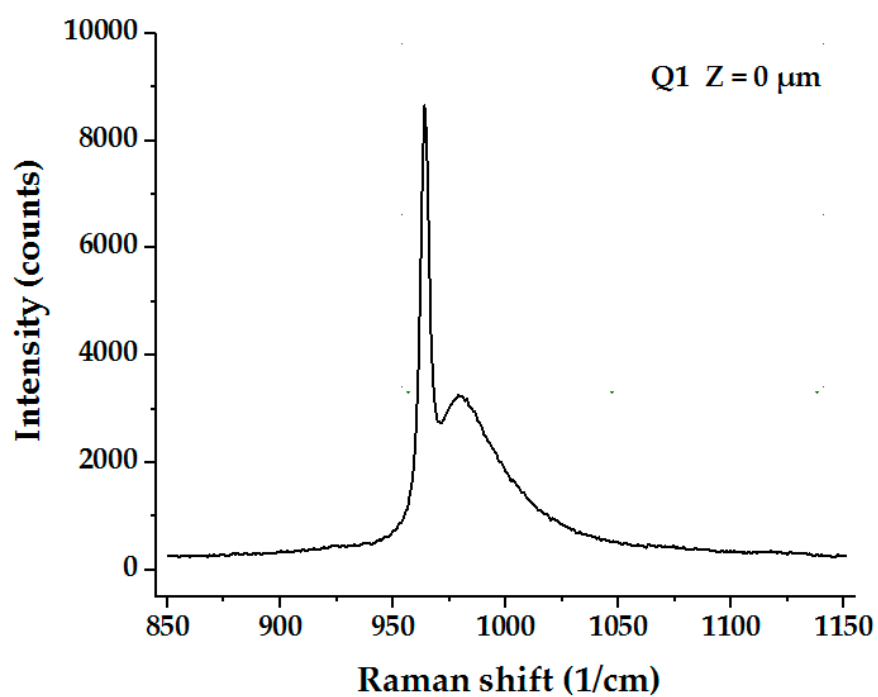

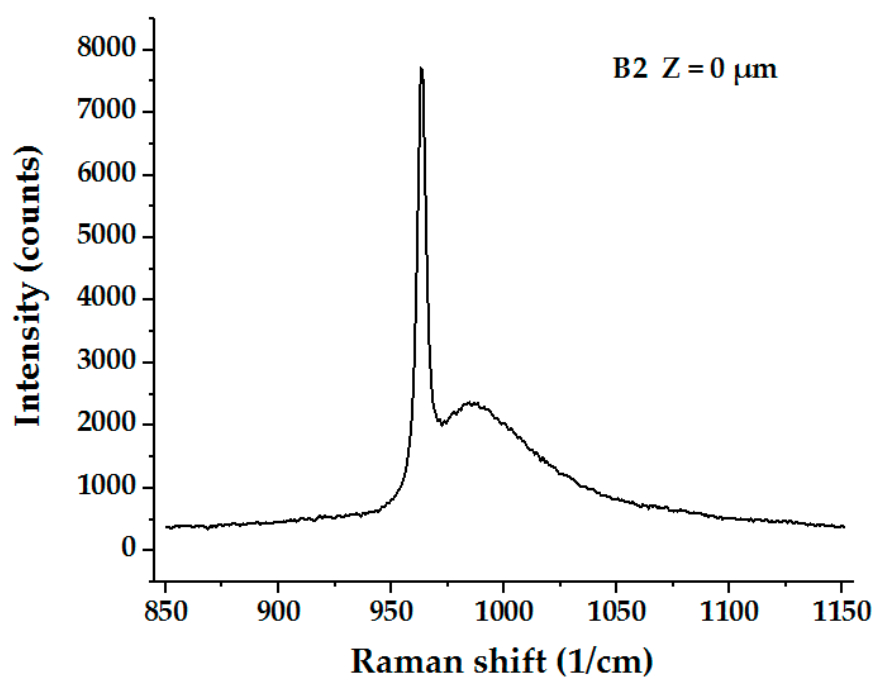

Figure S2. The spectra of sample A<sub>p</sub>, Q1 and B2.

Table S1. Fitting error (with respect to the peak positions) of sample A<sub>p</sub>, Q1 and B2 when Z = 0.

(focusing on surface of the sample)

| Sample         | Standard error of LOPC mode position (cm <sup>-1</sup> ) | Standard error of LO mode position (cm <sup>-1</sup> ) | Coefficient of determination (R <sup>2</sup> ) |
|----------------|----------------------------------------------------------|--------------------------------------------------------|------------------------------------------------|
| A <sub>p</sub> | 0.21                                                     | 0.01                                                   | 0.997                                          |
| Q1             | 0.23                                                     | 0.02                                                   | 0.992                                          |
| B2             | 0.39                                                     | 0.02                                                   | 0.989                                          |

Detailed fitting results for samples A<sub>p</sub>, Q1 and B2 using Origin 2020 software.

Fitting report of **A<sub>p</sub>**

Peak Fit (Gaussian\_LorenCross) (2020/2/11 17:28:37)

## Parameters

|                            |    | Value       | Shared | Standard Error | t-Value    | Prob> t      | Dependency |
|----------------------------|----|-------------|--------|----------------|------------|--------------|------------|
| Peak1(Gaussian_LorenCross) | y0 | 63.47283    | 0      | 14.22825       | 4.46104    | 1.13648E-5   | 0.86278    |
|                            | xc | 963.72989   | 0      | 0.01259        | 76517.9553 | 0            | 0.02919    |
|                            | A  | 11641.28881 | 0      | 97.79851       | 119.03339  | 6.32694E-264 | 0.72215    |
|                            | w  | 1.99894     | 0      | 0.02072        | 96.47265   | 6.01644E-236 | 0.68625    |
|                            | s  | 0.83863     | 0      | 0.02031        | 41.28341   | 4.00976E-129 | 0.61938    |
| Peak2(Gaussian_LorenCross) | y0 | 63.47283    | 0      | 14.22825       | 4.46104    | 1.13648E-5   | 0.86278    |
|                            | xc | 978.33756   | 0      | 0.20979        | 4663.34285 | 0            | 0.71241    |
|                            | A  | 3530.52807  | 0      | 33.37706       | 105.77708  | 3.62866E-248 | 0.67456    |
|                            | w  | 14.82902    | 0      | 0.22446        | 66.06486   | 1.24163E-186 | 0.75864    |
|                            | s  | 0.96038     | 0      | 0.01845        | 52.04949   | 9.2268E-157  | 0.83414    |

Reduced Chi-sqr = 9000.18516171

COD(R<sup>2</sup>) = 0.99669680442719

Iterations Performed = 22

Total Iterations in Session = 22

Fit converged. Chi-Sqr tolerance value of 1E-6 was reached.

Note: The peak centers were fixed for the first 20 iterations. This can be controlled using the @PFFC system variable.

Standard Error was scaled with square root of reduced Chi-Sqr.

## Statistics

|                         | B              |
|-------------------------|----------------|
| Number of Points        | 324            |
| Degrees of Freedom      | 315            |
| Reduced Chi-Sqr         | 9000.18516     |
| Residual Sum of Squares | 2835058.32594  |
| R-Square (COD)          | 0.9967         |
| Adj. R-Square           | 0.99661        |
| Fit Status              | Succeeded(100) |

Fit Status Code :

100 : Fit converged. Chi-Sqr tolerance value of 1E-6 was reached.

Note: The peak centers were fixed for the first 20 iterations. This can be controlled using the @PFFC system variable.

## ANOVA

|   |                   | DF  | Sum of Squares | Mean Square | F Value     | Prob>F |
|---|-------------------|-----|----------------|-------------|-------------|--------|
| B | Regression        | 8   | 8.55442E8      | 1.0693E8    | 11880.90012 | 0      |
|   | Residual          | 315 | 2835058.32594  | 9000.18516  |             |        |
|   | Uncorrected Total | 324 | 1.03405E9      |             |             |        |
|   | Corrected Total   | 323 | 8.58277E8      |             |             |        |

## Fitted Curves Plot

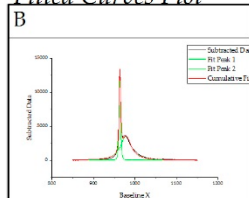

## Fitting report of Q1

Peak Fit (Gaussian\_LorenCross) (2020/2/12 12:29:46)

### Parameters

|                            |    | Value      | Shared | Standard Error | t-Value     | Prob> t      | Dependency |
|----------------------------|----|------------|--------|----------------|-------------|--------------|------------|
| Peak1(Gaussian_LorenCross) | y0 | 46.91213   | 0      | 18.46917       | 2.54002     | 0.01156      | 0.90226    |
|                            | xc | 964.12525  | 0      | 0.02237        | 43100.93755 | 0            | 0.01029    |
|                            | A  | 7021.38745 | 0      | 95.29698       | 73.67901    | 1.19402E-200 | 0.65052    |
|                            | w  | 1.97205    | 0      | 0.03163        | 62.34228    | 2.924E-179   | 0.5913     |
|                            | s  | 0.76073    | 0      | 0.03702        | 20.55058    | 3.98062E-60  | 0.47044    |
| Peak2(Gaussian_LorenCross) | y0 | 46.91213   | 0      | 18.46917       | 2.54002     | 0.01156      | 0.90226    |
|                            | xc | 982.55672  | 0      | 0.22919        | 4287.06245  | 0            | 0.47999    |
|                            | A  | 2905.68636 | 0      | 36.36367       | 79.90631    | 3.46512E-211 | 0.7312     |
|                            | w  | 18.12249   | 0      | 0.31379        | 57.7534     | 1.21941E-169 | 0.7358     |
|                            | s  | 0.94967    | 0      | 0.02674        | 35.52119    | 3.44E-112    | 0.85417    |

Reduced Chi-sqr = 10802.5250203

COD(R<sup>2</sup>) = 0.99198220134649

Iterations Performed = 16

Total Iterations in Session = 16

Fit converged. Chi-Sqr tolerance value of 1E-6 was reached.

Note: The peak centers were fixed for the first 20 iterations. This can be controlled using the @PFFC system variable.

Standard Error was scaled with square root of reduced Chi-Sqr.

### Statistics

|                         | Intensity      |
|-------------------------|----------------|
| Number of Points        | 324            |
| Degrees of Freedom      | 315            |
| Reduced Chi-Sqr         | 10802.52502    |
| Residual Sum of Squares | 3402795.38139  |
| R-Square (COD)          | 0.99198        |
| Adj. R-Square           | 0.99178        |
| Fit Status              | Succeeded(100) |

Fit Status Code :

100 : Fit converged. Chi-Sqr tolerance value of 1E-6 was reached.

Note: The peak centers were fixed for the first 20 iterations. This can be controlled using the @PFFC system variable.

### Fitted Curves Plot

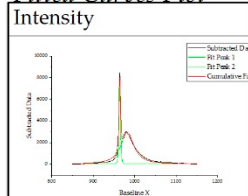

## Fitting report of **B2**

Peak Fit (Gaussian\_LorenCross) (2020/2/12 11:56:0)

### Parameters

|                            |    | Value      | Shared | Standard Error | t-Value     | Prob> t      | Dependency |
|----------------------------|----|------------|--------|----------------|-------------|--------------|------------|
| Peak1(Gaussian_LorenCross) | y0 | 58.08512   | 0      | 25.38727       | 2.28796     | 0.0228       | 0.95132    |
|                            | xc | 963.50163  | 0      | 0.02361        | 40814.11495 | 0            | 0.00421    |
|                            | A  | 6605.49355 | 0      | 88.19016       | 74.90057    | 8.88334E-203 | 0.62203    |
|                            | w  | 2.04807    | 0      | 0.03432        | 59.68204    | 9.27853E-174 | 0.58229    |
|                            | s  | 0.85578    | 0      | 0.03001        | 28.512      | 2.96643E-89  | 0.46578    |
| Peak2(Gaussian_LorenCross) | y0 | 58.08512   | 0      | 25.38727       | 2.28796     | 0.0228       | 0.95132    |
|                            | xc | 991.20417  | 0      | 0.38895        | 2548.38977  | 0            | 0.42579    |
|                            | A  | 1927.70363 | 0      | 38.17159       | 50.501      | 4.5285E-153  | 0.84845    |
|                            | w  | 27.25966   | 0      | 0.6606         | 41.26527    | 4.50701E-129 | 0.81669    |
|                            | s  | 0.90457    | 0      | 0.05247        | 17.23923    | 2.27579E-47  | 0.89288    |

Reduced Chi-sqr = 10166.0610398

COD(R<sup>2</sup>) = 0.98904192013658

Iterations Performed = 19

Total Iterations in Session = 19

Fit converged. Chi-Sqr tolerance value of 1E-6 was reached.

Note: The peak centers were fixed for the first 20 iterations. This can be controlled using the @PFFC system variable.

Standard Error was scaled with square root of reduced Chi-Sqr.

### Statistics

|                         | Intensity      |
|-------------------------|----------------|
| Number of Points        | 324            |
| Degrees of Freedom      | 315            |
| Reduced Chi-Sqr         | 10166.06104    |
| Residual Sum of Squares | 3202309.22752  |
| R-Square (COD)          | 0.98904        |
| Adj. R-Square           | 0.98876        |
| Fit Status              | Succeeded(100) |

Fit Status Code :

100 : Fit converged. Chi-Sqr tolerance value of 1E-6 was reached.

Note: The peak centers were fixed for the first 20 iterations. This can be controlled using the @PFFC system variable.

### Fitted Curves Plot

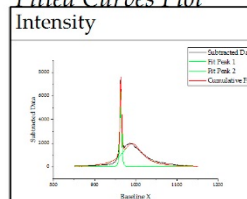

Figure S3. Detailed fitting results for samples A<sub>p</sub>, Q1 and B2 (Origin 2020).

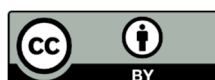

© 2020 by the authors. Submitted for possible open access publication under the terms and conditions of the Creative Commons Attribution (CC BY) license (<http://creativecommons.org/licenses/by/4.0/>).
